# Supplementary material for: A thermally and mechanically stable eco-friendly nanocomposite for chemical sensor applications
Source: Royal Society of Chemistry journal article supplement (doi:10.1039/c2nj40549k), 2012-01-01

## Supporting Information

Supporting information ( $\Phi$ ): FT-IR spectra of PPC and NC.

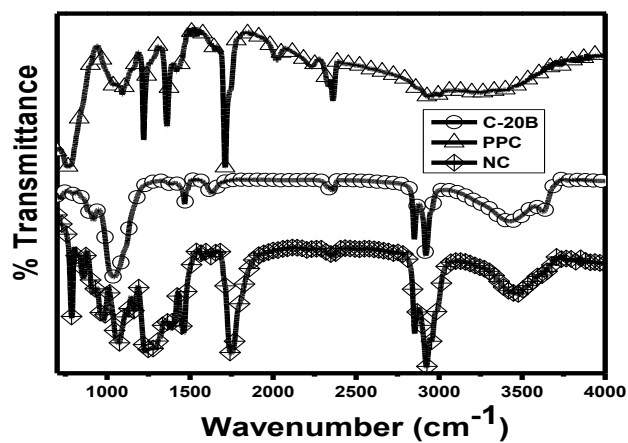

Supporting information ( $\Omega$ ): TGA at various heating rate (a,b), temperature-conversion curves (c) and time-conversion curves (d) of PPC and NC.

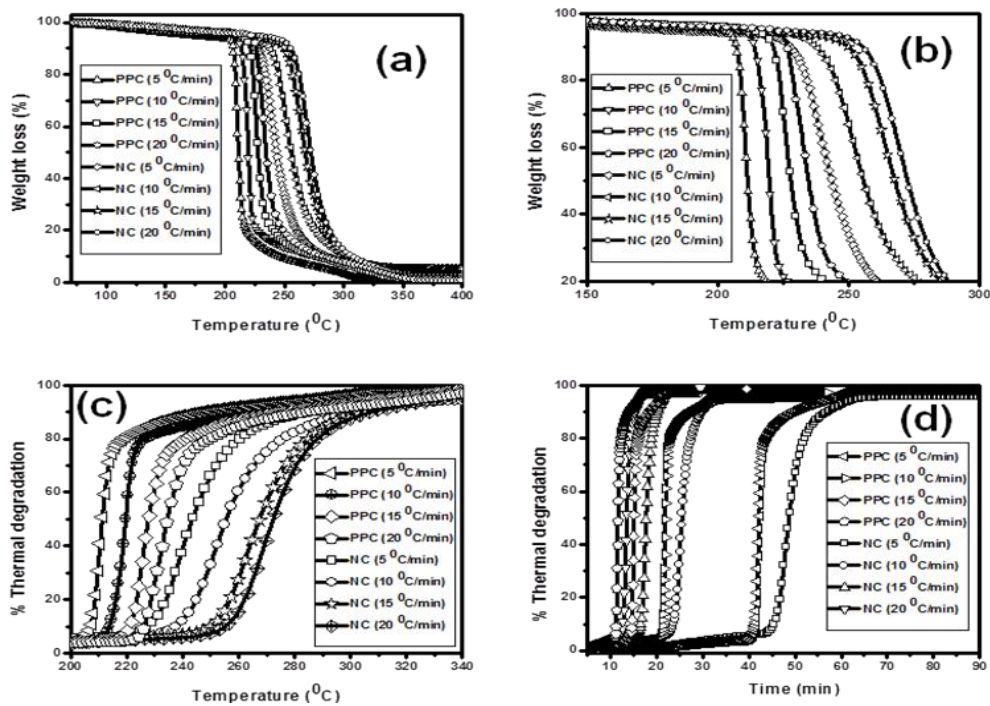

Supplement: c2nj40549k.pdf [file c2nj40549k.pdf]
